## Sequence Analysis of the Genome of an Oil-Bearing Tree, *Jatropha curcas* L.

SHUSEI Sato<sup>1</sup>, HIDEKI Hirakawa<sup>1</sup>, SACHIKO Isobe<sup>1</sup>, EIGO Fukai<sup>1</sup>, AKIKO Watanabe<sup>1</sup>, MIDORI Kato<sup>1</sup>, KUMIKO Kawashima<sup>1</sup>, CHIHARU Minami<sup>1</sup>, AKIKO Muraki<sup>1</sup>, NAOMI Nakazaki<sup>1</sup>, CHIKA Takahashi<sup>1</sup>, SHINOBU Nakayama<sup>1</sup>, YOSHIE Kishida<sup>1</sup>, MITSUYO Kohara<sup>1</sup>, MANABU Yamada<sup>1</sup>, HISANO Tsuruoka<sup>1</sup>, SHIGEMI Sasamoto<sup>1</sup>, SATOSHI Tabata<sup>1,\*</sup>, TOMOYUKI Aizu<sup>2</sup>, ATSUSHI Toyoda<sup>2</sup>, TADASU Shin-i<sup>2</sup>, YOHEI Minakuchi<sup>2</sup>, YUJI Kohara<sup>2</sup>, ASAO Fujiyama<sup>2,3</sup>, SUGURU Tsuchimoto<sup>4</sup>, SHIN'ICHIRO Kajiyama<sup>5</sup>, ERI Makigano<sup>6</sup>, NOBUKO Ohmido<sup>6</sup>, NAKAKO Shibagaki<sup>7</sup>, JOYCE A. Cartagena<sup>7</sup>, NAOKI Wada<sup>7</sup>, TSUTOMU Kohinata<sup>8</sup>, ALIPOUR Atefeh<sup>8</sup>, SHOTA Yuasa<sup>8</sup>, SACHIIHIRO Matsunaga<sup>8</sup>, and KIICHI Fukui<sup>8,\*</sup>

Kazusa DNA Research Institute, 2-6-7 Kazusa-kamatari, Kisarazu, Chiba 292-0818, Japan<sup>1</sup>; Center for Genetic Resource Information, National Institute of Genetics, Yata 1111, Mishima, Shizuoka 411-8540, Japan<sup>2</sup>; Informatics Research Division, National Institute of Informatics, 2-1-2 Hitotsubashi, Chiyoda-ku, Tokyo 101-8430, Japan<sup>3</sup>; Institute of Molecular and Cellular Biosciences, The University of Tokyo, 1-1-1, Yayoi, Bunkyo-ku, Tokyo 113-0032, Japan<sup>4</sup>; Graduate School of Biology Oriented Science and Technology, Kinki University, 930 Nishi-Mitani, Kinokawa, Wakayama 649-6493, Japan<sup>5</sup>; Graduate School of Human Development and Environment, Kobe University, Tsurukabuto 3-11, Nada, Kobe 657-8501, Japan<sup>6</sup>; Bioengineering for the Interest of Environmental Sustainability (Sumitomo Electric Industries), Graduate School of Engineering, Osaka University, 1-1 Yamadaoka, Suita, Osaka 565-0871, Japan<sup>7</sup> and Laboratory of Dynamic Cell Biology, Department of Biotechnology, Graduate School of Engineering, Osaka University, 1-1 Yamadaoka, Suita, Osaka 565-0871, Japan<sup>8</sup>

\*To whom correspondence should be addressed. Tel. +81 438-52-3935. Fax. +81 438-52-3934. E-mail: tabata@kazusa.or.jp (S.T.); Tel. +81 6-6879-7440. Fax. +81 6-6879-7441. E-mail: kfukui@bio.eng.osaka-u.ac.jp (K.F.)

Edited by Katsumi Isono  
(Received 21 October 2010; accepted 12 November 2010)

### Abstract

The whole genome of *Jatropha curcas* was sequenced, using a combination of the conventional Sanger method and new-generation multiplex sequencing methods. Total length of the non-redundant sequences thus obtained was 285 858 490 bp consisting of 120 586 contigs and 29 831 singlets. They accounted for ~95% of the gene-containing regions with the average G + C content was 34.3%. A total of 40 929 complete and partial structures of protein encoding genes have been deduced. Comparison with genes of other plant species indicated that 1529 (4%) of the putative protein-encoding genes are specific to the Euphorbiaceae family. A high degree of microsynteny was observed with the genome of castor bean and, to a lesser extent, with those of soybean and *Arabidopsis thaliana*. In parallel with genome sequencing, cDNAs derived from leaf and callus tissues were subjected to pyrosequencing, and a total of 21 225 unigene data have been generated. Polymorphism analysis using microsatellite markers developed from the genomic sequence data obtained was performed with 12 *J. curcas* lines collected from various parts of the world to estimate their genetic diversity. The genomic sequence and accompanying information presented here are expected to serve as valuable resources for the acceleration of fundamental and applied research with *J. curcas*, especially in the fields of environment-related research such as biofuel production. Further information on the genomic sequences and DNA markers is available at <http://www.kazusa.or.jp/jatropha/>.

**Key words:** *Jatropha curcas* L.; genome sequencing; cDNA sequencing; microsatellite markers

## 1. Introduction

To reconcile increasing energy consumption with worsening global environmental conditions is a fundamental concern of the contemporary society. Fossil fuel deposits are rapidly diminishing, and their consumption raises carbon dioxide discharge levels. Alternative fuels, such as bioethanol and biodiesel, show great promise for alleviating the problems caused by the consumption of fossil fuel.

*Jatropha curcas* L. is a plant belonging to the family Euphorbiaceae that is endemic to tropical America. It is now grown commercially in tropical and subtropical Africa and Asia. *Jatropha* has considerable potential for various uses including biofuels.<sup>1</sup> The plant can grow at rainfall levels as low as 200 mm per annum.<sup>2</sup> Medicinal compounds are found in various parts of the plant,<sup>1</sup> but it is the potentially high yield of oil per unit land area, which is second only to oil palm,<sup>3</sup> that makes *Jatropha* an outstanding biofuel plant. Furthermore, the quality of oil in its seeds is suitable for production of biodiesel as they contain more than 75% unsaturated fatty acids.<sup>4</sup> Despite its cultivation throughout the tropical and subtropical world, the positive attributes of this plant are not fully understood in terms of breeding and utilization.<sup>3</sup> This can be attributed mainly to the lack of information on its genetics and genomics. The genome size (~410 Mb) and the base composition have been estimated by flow cytometry, and karyotypes have been characterized.<sup>5</sup> Expressed sequence tags (ESTs) from developing and germinating *Jatropha* seeds have been reported.<sup>6</sup> However, no further information on the genomic structure of *J. curcas* is available.

To understand the genetic system of this plant and to accelerate the process of molecular breeding, we analysed the structure of the whole genome of *J. curcas*. For genome sequencing, we adopted a combination of BAC end sequencing and shotgun sequencing by the conventional Sanger method and the new-generation multiplex methods, which was followed by information analyses. In addition, microsatellite markers have been developed using the sequence information, and polymorphism among various *J. curcas* varieties was examined. The information and material resources for the *Jatropha* genome generated in this study will enhance both fundamental and applied research with *J. curcas* and related plants.

## 2. Materials and methods

### 2.1. Plant materials

A *J. curcas* line originating from the Palawan Island in the Philippines was subjected to genome

sequencing. The following 12 lines were used for diversity analysis: Palawan, Indonesia, Indonesia IS, Thai, Chinese, Mexico 2b, Guatemala 1, Guatemala 2, Tanzania, Madagascar, Cape Verde, and Uganda. The Indonesia IS and Thai lines were purchased from IS Co. Ltd. (Tokyo, Japan) and Nikko-Seed Co. Ltd. (Tochigi, Japan), respectively. The Uganda and the remaining nine lines were kindly provided by BBL International (Osaka, Japan) and Nippon Biodiesel Fuel Co., Ltd. (Tokyo, Japan), respectively.

### 2.2. Construction of BAC libraries

BAC genomic libraries were constructed using the genomic DNA of *J. curcas* partially digested with either *Mbol* or *HindIII* and Copy Control pCC1BAC as a cloning vector. The average insert size of these libraries was 80.2 kb for the *Mbol* library and 94.9 and 63.4 kb for two independent preparations of the *HindIII* libraries. Both libraries covered the haploid genome 9.2 times in total.

### 2.3. BAC sequencing

To analyse end sequences, BAC DNAs were amplified using a TempliPhi large construction kit (GE Healthcare, UK), and the end sequences were analysed according to the Sanger method using a cycle sequencing kit (Big Dye-terminator kit, Applied Biosystems, USA) with DNA sequencer type 3730xl (Applied Biosystems). High-quality BAC sequences were determined by the shotgun method using the Sanger sequencing protocol, as described previously.<sup>7</sup>

### 2.4. Shotgun genomic sequencing

For sequencing by the Sanger method, shotgun libraries with average insert sizes of 2.5 kb were generated using pBluescript SK- as a cloning vector, and these were used to transform *Escherichia coli* ElectroTen-Blue (Agilent Technologies, Santa Clara, CA, USA). The shotgun clones were propagated in microtiter plates, and the plasmid DNA was amplified using a TempliPhi kit (GE Healthcare). Sequencing was performed using a cycle sequencing kit (Big Dye-terminator Cycle Sequencing kit, Applied Biosystems) with DNA sequencer type 3730xl (Applied Biosystems) or DeNOVA-5000HT (Shimadzu Co., Japan) according to the protocols recommended by the manufacturers.

High-throughput multiplex sequencing was carried out using a Genome Sequencer (GS) FLX Instrument (Roche Diagnostics, USA) and Genome Analyzer II (Illumina Inc., USA) sequencers. A 5- $\mu$ g sample of *Jatropha* total cellular DNA was sheared by nebulization and subjected to library preparation followed by shotgun sequencing using the GS FLX platform. For the 3-kb paired-end sequencing, the library was

prepared using GS Titanium Library Paired End Adaptors according to the manufacturer's instructions. For sequencing by an Illumina-solexa GAI sequencer, the sample was prepared according to the manufacturer's manual. Briefly, 1 µg of the total cellular genomic DNA was fragmented by the Covaris S1 instrument (Covaris Inc.). The fragmented DNA was repaired, and the adapters for paired-end sequencing (36, 51, and 76 cycles) were then ligated to the repaired DNA fragment. The size-selected fragment (300–350 bp) by agarose gel electrophoresis was PCR amplified, and the PCR product was validated using a 2100 Bioanalyzer (Agilent Technologies) and a 7900HT Fast Real-Time PCR system (ABI). The sample was then run on a Genome Analyzer II using the 36 cycles sequencing kits. Base-calling was performed using the Genome Analyzer Pipeline.

### 2.5. cDNA sequencing

Total RNA was extracted from leaf and callus tissue using an RNeasy Plant Mini Kit (Qiagen, Germany). mRNA was purified from the total RNA using Oligotex-dT30 (Takara Bio Inc., Japan). Sequencing was performed with a GS FLX Instrument (Roche Diagnostics) using the cDNA rapid library method according to the manufacturer's instructions.

### 2.6. Assembly of sequence data

Reconstruction of the genome sequence of *J. curcas* was performed in the following two steps: assembly of sequence data generated by different types of DNA sequencers, and scaffolding and base correction.

The sequence data collected according to the Sanger protocol using a 3730xl capillary sequencer were subjected to trimming of sequences derived from cloning vectors with the Figaro and Lucy programs,<sup>8</sup> followed by assembly with the PCAP.rep program.<sup>9</sup> Base-calling of the sequence data generated by pyrosequencing using a GS FLX sequencer was performed using the Pyrobayes program.<sup>10</sup> The sequence reads artificially replicated during an emulsion PCR were removed by a 454 replicate filter,<sup>11</sup> and the remaining reads were assembled using MIRA version 3 rc4 software.<sup>12</sup> Contigs and singlets generated by assembly using the Sanger protocol and pyrosequencing were separately subjected to similarity searches for sequences of the chloroplast (GenBank: FJ695500) of *J. curcas* and the mitochondria (GenBank: Y08501) of *Arabidopsis thaliana*<sup>13</sup> using the Megablast program.<sup>14</sup> Matching sequences were then removed. All remaining contigs and singlets were assembled using the PCAP.rep program.<sup>9</sup> BAC end sequences in which the vector sequences were trimmed by Figaro and Lucy programs<sup>8</sup> in advance

were further integrated in the resulting sequences using PCAP.rep.<sup>9</sup> Then, sequences 99 bp and shorter were removed.

The resulting contigs and singlets were designated as follows. The contigs containing sequences from the Sanger sequencing, pyrosequencing, and BAC end sequencing were prefixed with 'JcCA' followed by a seven-digit number. The contigs containing sequences from both the Sanger and 454 sequencing were prefixed with 'JcCB' followed by a seven-digit number. The contigs containing sequences from the Sanger sequencing and the pyrosequencing were prefixed with 'JcCC' and 'JcCD', respectively. The singlets from the Sanger sequencing and pyrosequencing that were not assembled into other sequences throughout the whole process were prefixed with 'JcSR' and 'JcPR', respectively.

For improvement of data quality, both single and mate-pair reads by an Illumina GAI sequencer were collected and assembled using the Velvet program.<sup>15</sup> The resulting contig sequences were mapped onto the contigs generated by hybrid assembly to correct the short insertion–deletion (indels) errors.

Both paired-end reads of the genomic DNA and single reads of cDNAs by the GS FLX sequencer were used for scaffolding. Paired-end reads of the genomic DNA were assembled with the MIRA program<sup>12</sup> according to the manufacturer's instructions, and the resulting sequences were used for scaffolding of the contig sequences generated by the Sanger sequencing and pyrosequencing using the GS reference mapper ver. 2.3 program. In parallel, a mixture of cDNAs derived from leaf and callus tissue of *Jatropha* was subjected to sequencing by GS FLX, and the data obtained were subjected to assembly with the MIRA ver. 3.0.5 program in the EST mode.<sup>12</sup> In addition, the resulting cDNA sequences as well as the *Jatropha* ESTs retrieved from public DNA databases were used for scaffolding using the Blat program.<sup>16</sup>

### 2.7. Gene assignment

Gene prediction and modelling were performed by automatic gene assignment programs that employ *ab initio* gene finding and similarity searches. For *ab initio* gene finding, predictions of protein-coding regions were carried out using GeneMark.hmm<sup>17</sup> and Genescan<sup>18</sup> programs with the matrix trained by an *A. thaliana* gene set, and predictions of exon–intron structure were performed using NetGene2<sup>19</sup> and SplicePredictor<sup>20</sup> programs. Similarity searches for potential protein-coding regions and all contigs were performed against a Uniref database (<http://www.ebi.ac.uk/uniref/>) using Blastp and Blastx programs<sup>21</sup> with a cut-off ( $E$ -value  $\leq 1e-3$ ). The exon–intron

structure of potential protein-coding regions and the contigs homologous to the Uniref database (<http://www.ebi.ac.uk/uniref/>) were predicted using the Nap program.<sup>22</sup> Suitable exon-intron structures were determined by considering all the information above. The predicted gene structures were further confirmed by comparison to cDNA sequences analysed in this study. The protein-coding genes assigned in this manner were denoted by IDs with the contig names followed by sequential numbers from one end to another. They were classified into four categories based on sequence similarity to registered genes: genes with complete structure, pseudogenes, genes with partial structure, and transposons/retrotransposons.

### 2.8. Functional assignment and classification of potential protein-coding genes

To assign the gene families, functional domains, GO terms, and GO accession numbers,<sup>23</sup> the predicted genes were searched against InterPro using InterProScan<sup>24</sup> software. Genes with an *E*-value of <1.0 were taken into account. GO terms were grouped into plant GO slim categories using the map2slim program (<http://www.geneontology.org/GO.slims.shtml>).

The predicted protein-encoding genes were mapped onto KEGG metabolic pathways<sup>25</sup> using the Blastp program<sup>21</sup> against the GENES database.<sup>25</sup> Thresholds of amino acid sequence identity  $\geq 25\%$  and of length coverage of the query sequence  $\geq 50\%$  with a cut-off (*E*-value  $\leq 1e-10$ ) were applied.

### 2.9. Phylogenetic analysis

Evolutionary relationships of proteins of casben synthase genes, disease resistance genes, MADS-box genes, flowering genes, and COL genes were analysed using predicted amino acid sequences from different databases aligned with the program CLUSTALW (Ver. 1.83).<sup>26</sup> Evolutionary relationships were inferred using a neighbour-joining algorithm.<sup>27</sup> All positions containing alignment gaps and missing data were eliminated only in pairwise sequence comparisons. Phylogenetic trees were constructed with MEGA4 software.<sup>28</sup>

### 2.10. Polymorphism analysis

Microsatellite or simple sequence repeats (SSRs) 15 nucleotides in length, containing all possible combinations of di-nucleotide (NN), tri-nucleotide (NNN) and tetra-nucleotide (NNNN) repeat, were identified from the *Jatropha* genome sequences using the SSRIT (SSR Identification Tool) program.<sup>29</sup> Primer pairs for amplification of SSR-containing regions were designed based on the flanking sequences of

each SSR with the Primer 3 program<sup>30</sup> so that amplified fragment sizes were between 90 and 300 bp in length. One hundred microsatellite markers were subjected to examination of polymorphisms among 12 lines of *J. curcas*.

PCR amplifications (5  $\mu$ l) were performed on 0.7 ng of *Jatropha* genomic DNA in 1  $\times$  PCR buffer (BIOLINE, London, UK), 3 mM MgCl<sub>2</sub>, 0.04 U BIOTAQ™ DNA Polymerase (BIOLINE), 0.8 mM dNTPs, and 0.4  $\mu$ M of each primer, using the modified 'Touchdown PCR' protocol described by Sato *et al.*<sup>7</sup> PCR products were separated by 10% polyacrylamide gel electrophoresis using TBE buffer, and data were collected as described previously. Allele detection and genotype code typing were performed using the Polyans program (ver.1.1; <http://www.kazusa.or.jp/polyans>). The presence or the absence of amplification and the number of different-sized fragments, which was taken as the number of alleles, were recorded. Loci for which there was no amplification were designated as null alleles. PIC was calculated using the following equation:

$$PIC_i = 1 - \sum_{j=1} P_{ij}^2$$

where  $P_{ij}$  is the frequency of the *j*th allele for the *i*th locus. NTSYSpc ver. 2.21c software (Applied Biostatistics Inc., New York, USA) was employed to perform cluster analysis. The SimQual and SAHN modules were used for estimation of genetic distance and a genetic tree, respectively, with the coefficient in SimQual set to SM, and the clustering method set to UPGMA.

## 3. Results and discussion

### 3.1. Sequence analysis of the *Jatropha* genome

The strategy and the status of sequencing and assembly are summarized in Fig. 1. Briefly, the 1 025 000 reads of the Sanger sequencing and the 2 312 828 reads of pyrosequencing, which were appropriately processed in advance as indicated in Fig. 1, were independently assembled using the PCAP.rep<sup>9</sup> and MIRA programs,<sup>12</sup> respectively. The resulting contigs and singlets were subjected to hybrid assembly by PCAP.rep,<sup>9</sup> and the 53 000 BAC end sequences were further integrated.

For improvement of data quality, 86 028 428 (36 bases long from each end for each read) and 96 580 336 short-reads (50 and 31 bases long from each end for each read) by mate-pair sequencing with the Illumina GAI sequencer were assembled into 569 576 contigs (total length: 75 539 079 bp) by the Velvet program.<sup>15</sup> The resulting contig

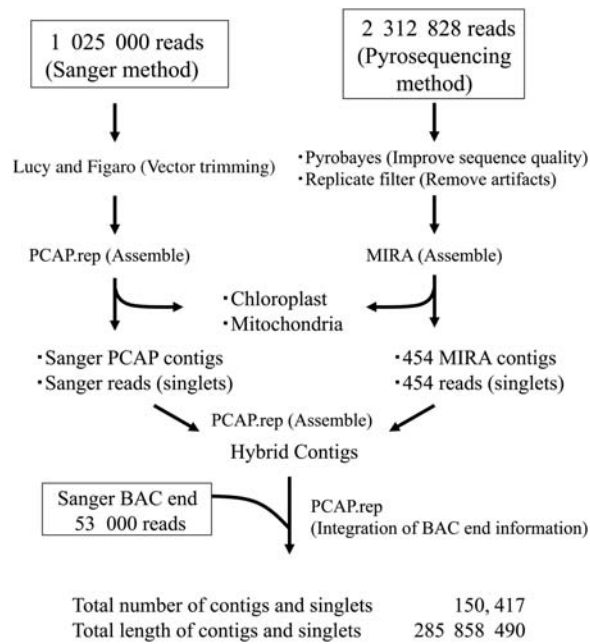

**Figure 1.** The strategy and status of sequencing and assembly.

sequences were mapped onto those generated by hybrid assembly to correct short indels errors. These indels were probably attributed to classified insertions, deletions, and mismatches by their association with miscall from homopolymer effects. As a result of mapping, 7459 loci on the 5025 contigs were revised.

A total of 695 928 3-kb paired-end reads by the GS FLX sequencer were used for scaffolding of the generated contigs and singlets using the GS reference mapper ver. 2.3 program, as described in the 'Materials and Methods' section. In parallel, 991 050 reads of cDNA sequences by pyrosequencing were collected; 534 137 were derived from leaf tissue and 456 913 from callus tissue. The cDNA sequences were assembled with MIRA 3.05 in the EST mode,<sup>12</sup> and 21 225 unigene sets were generated consisting of 13 610 contigs and 7615 singlets used for scaffolding by the BLAT program.<sup>16</sup> In addition, unigenes generated from 26 447 ESTs registered in public DNA databases (<http://www.ncbi.nlm.nih.gov/dbEST/>) were also used for scaffolding. As a result of scaffolding, the 44 153 contigs and singlets constructed by hybrid assembly were integrated into 15 300 scaffolds. The total length of the scaffolds was 129 291 074 bp. The longest scaffold (JcS\_100001) had 56 042 bp, and the average scaffold length was 8450 bp. The constructed scaffolds were designated as JcS followed by sequential numbers.

The total length of the final genomic sequences of *J. curcas* obtained was 285 858 490 bp, consisting of 120 586 contigs (276 710 623 bp total) and 29 831 singlets (9 147 867 bp total), which is ~70

and 75% of the whole genome of 410<sup>5</sup> and 380 Mb (N. Wada, unpublished result), respectively, estimated by flow cytometry. The average length of contigs and singlets was 1900 bp. Statistics of the assembly are summarized in Table 1. The longest contig was 29 744 bp, and N50 length was 3833 bp. The distribution of contig lengths is shown in the Supplementary Fig. S1. The average G + C content of the contigs was 34.3%.

Coverage of gene space in the *Jatropha* genomic sequences was estimated roughly by surveying the matched non-redundant cDNA sequences obtained in this study. Of 21 225 non-redundant cDNA sequences and 26 447 EST sequences in the public databases, 45 029 matched *Jatropha* genomic sequences with an identity of 95% or more for a stretch of 50 nucleotides, suggesting that 95% of the gene space in the *Jatropha* genome was covered by the genomic sequences in this study.

We adopted here the sequencing strategy that combines the conventional Sanger method and the new-generation multiplex sequencing methods with the aid of various computer software for assembly. This strategy is superior in that shortcomings of respective methods are compensated by each other, enabling acquisition of sequences of higher quality in lower cost within a shorter period of time, thus is becoming popular for genome sequencing in both bacteria and eukaryotes.

**Table 1.** Assembly statistics

|                                           |             |
|-------------------------------------------|-------------|
| Total length of contigs and singlets      | 285 858 490 |
| Total number of contigs and singlets      | 150 417     |
| Average length of contigs and singlets    | 1900        |
| Maximum length of contigs and singlets    | 29 744      |
| N50                                       | 3833        |
| G + C content (%)                         | 34.3        |
| Number of contigs (JcCA)                  | 32 212      |
| Number of contigs (JcCB)                  | 60 363      |
| Number of contigs (JcCC)                  | 2483        |
| Number of contigs (JcCD)                  | 25 528      |
| Number of singlets (JcSR)                 | 26 819      |
| Number of singlets (JcPR)                 | 1347        |
| Number of BAC end sequences (JHL/JHS/JMS) | 1665        |
| Contigs                                   |             |
| Total number of contigs                   | 120 586     |
| Total length of contigs                   | 276 710 623 |
| Average length of contigs                 | 2295        |
| Singlets                                  |             |
| Total number of singlets                  | 29 831      |
| Total length of singlets                  | 9 147 867   |
| Average length of singlets                | 307         |

### 3.2. Characteristic features of the genome

**3.2.1. Repetitive sequences** A total of 41 428 di-, tri-, and tetra-nucleotide SSRs  $\geq 15$  bp were identified in the *Jatropha* genomic sequences (Supplementary Table S1). The frequency of the occurrence of these SSRs was estimated to be one SSR in every 7.0 kb in the 289 Mb sequences of the *Jatropha* genome. The di-, tri-, and tetra-nucleotide SSRs accounted for 46.3, 34.3, and 19.4% of the identified SSRs, respectively (Supplementary Table S1). The SSR patterns that appeared frequently were (AT)<sub>n</sub>, (AAT)<sub>n</sub>, and (AAAT)<sub>n</sub>, each representing 71% of di-nucleotide, 60% of tri-nucleotide, and 58% of tetra-nucleotide repeat units, respectively. The tri-nucleotide SSRs, particularly (AAG)<sub>n</sub> and (AGC)<sub>n</sub>, were preferentially found in exons. (AT)<sub>n</sub>, (AG)<sub>n</sub>, and (AAT)<sub>n</sub> were enriched in 5' and 3' untranslated regions, and (AC)<sub>n</sub> frequently occurred in introns (Supplementary Table S1).

A search of the *Jatropha* genomic sequences using the repeat sequence finding program RECON<sup>31</sup> unravelled the occurrence of a variety of repeat elements including class I and class II transposable element (TE) subfamilies and some that were difficult to classify into known subfamilies. Composition of these repeat sequences was analysed with the RepeatMasker program (<http://repeatmasker.org/>); the results are summarized in Table 2. The identified repetitive sequences in total occupied 36.6% of the *Jatropha* genomic sequences. The most abundant repeat category was class I TE (29.9%), in which Gypsy type (19.6%) and Copia type (8.0%) LTR retroelements constituted major components.

**3.2.2. RNA-coding genes** A combination of computer prediction and similarity searches of the

structural RNA sequence library resulted in identification of 597 putative genes for transfer RNAs in the *Jatropha* genomic sequences. Although 80 of these were likely to be pseudogenes, the remaining 517 could code for intact tRNAs with 54 species of anticodons (Supplementary Table S2). This is sufficient for translation of all the amino acids based on the universal codon table.

A total of 65 genes for snRNAs were assigned by referring to the list of *A. thaliana* snRNAs (Supplementary Table S3).<sup>32</sup> Some of these genes were found on the same contigs and scaffolds; thus, they are likely to form clusters in the genome, as they do in *A. thaliana*.

### 3.3. Characteristic features of protein-encoding genes

**3.3.1. Prediction of protein-encoding genes** The *Jatropha* genomic sequences were subjected to an automatic assignment of protein-encoding genes, and a total of 40 929 genes, besides 16 447 transposon-related genes, were assigned. Complete structures were predicted for 9870 genes, but only partial structures were predicted for 17 863 genes. In addition, 1960 and 11 236 genes were likely to be pseudogenes with complete and truncated structures, respectively. Of the 40 929 presumptive protein-encoding genes, 15 573 (38.0%) carried ESTs with sequence identity of 95% or more for a stretch of 50 nucleotides.

Structural features of the protein-encoding genes in *J. curcas* were investigated in detail for 146 genes predicted on the 17 BAC clones (1.36 Mb in total) for which high-quality sequences were obtained by manual finishing and annotation (Supplementary Table S4). As shown in Supplementary Table S5, the basic structures of the protein-encoding genes in *J. curcas* are similar to those of *A. thaliana* except for the average lengths of genes and introns: 3064 versus 1918 bp and 356 versus 157 bp in *J. curcas* and *A. thaliana*, respectively.

**3.3.2. Gene components** A similarity search of translated amino acid sequences of the 40 929 presumptive protein-encoding genes was performed using the TrEMBL database as a protein sequence library.<sup>33</sup> The results indicated that 31 822 (77.7%) genes had significant ( $E$ -value  $\leq 1e-20$ ) sequence similarity to those in this database. Of these genes, 13 067 (41.0%) genes showed sequence similarities to those in a public EST database (<http://www.ncbi.nlm.nih.gov/dbEST/>) with a cut-off ( $E$ -value  $\leq 1e-20$ ) using tBLASTN.

The 40 929 presumptive protein-encoding genes assigned in *J. curcas* and those in castor bean (*Ricinus communis*; 31 221 genes),<sup>34</sup> which belongs

**Table 2.** Repetitive sequences in the *Jatropha* genomic sequences

| Repeat type          | Jatropha genomic sequences |               |                        |
|----------------------|----------------------------|---------------|------------------------|
|                      | Number of elements         | Coverage (kb) | Percentage of sequence |
| Class I              |                            |               |                        |
| LINEs                | 195                        | 136.9         | 0.05                   |
| LTR: Copia           | 31 740                     | 22 318.2      | 8.03                   |
| LTR: Gypsy           | 67 658                     | 56 655.7      | 19.60                  |
| LTR: other           | 13 454                     | 6436.6        | 2.23                   |
| Total class I        | 113 047                    | 86 447.4      | 29.91                  |
| Class II             |                            |               |                        |
| Coding class II      | 5709                       | 4102.9        | 1.42                   |
| MITE                 | 5980                       | 1802.8        | 0.62                   |
| Total class II       | 11 689                     | 5905.7        | 2.04                   |
| Short tandem repeats | 2092                       | 148.1         | 0.05                   |
| Unclassified         | 25 977                     | 14 953.3      | 5.17                   |

to the same family as *Jatropha*, and *A. thaliana* (32 615 genes), were classified into plant GO slim categories<sup>35</sup> for comparison (Fig. 2). The percentage of the number of genes classified into each GO slim category (i.e. 'biological process', 'cellular component', and 'molecular function') was calculated for *J. curcas*, *R. communis*, and *A. thaliana* (Fig. 2).

Of 40 929 presumptive genes in the *Jatropha* genomic sequences, 2213 genes could be mapped onto 134 of the 155 metabolic pathways in the KEGG database,<sup>25</sup> whereas the 2975 and 4115 genes of *R. communis* and *A. thaliana* were mapped onto 140 and 135 pathways, respectively. Twenty-nine pathways, including 'fatty acid metabolism' in lipid metabolism, 'methionine metabolism' and 'lysine degradation' in amino acid metabolism, and 'benzoate degradation via hydroxylation' in xenobiotics biodegradation and metabolism, contained enzyme(s) on which the genes in the *Jatropha* genome were solely mapped (Supplementary Table S6).

### 3.4. Characteristic features of the genes in *J. curcas*

**3.4.1. Genes involved in synthesis of triacylglycerols** *Jatropha curcas* is expected to contribute to biodiesel production through its ability to biosynthesize and accumulate considerable amounts of triacylglycerols (TAGs) in seeds. For this reason, the genes involved in TAG biosynthesis are of great interest and some of those genes have already been cloned from *J. curcas*.<sup>36,37</sup> Recently, the collection of ESTs from developing and germinating *Jatropha* seeds has been reported.<sup>6</sup> We manually annotated and summarized the gene models for fatty acid and TAG biosynthesis that were predicted in this work, together with related data that have been deposited to GenBank (Supplementary Table S7). The *Jatropha* genome appears to contain basically one gene for each enzyme isoform, and no obvious gene duplication particular to this plant was identified in this category. One gene model for a recently identified soluble type of DGAT<sup>38</sup> also existed in the *Jatropha* genome. To improve *Jatropha* oil quality for biodiesel, its fatty acid composition could be changed by altering the expression of some of the genes listed in Supplementary Table S7.

**3.4.2. Genes related to phorbol ester biosynthesis** *Jatropha curcas* is known to produce tumour-promoting phorbol esters.<sup>39</sup> Accordingly, depression of the phorbol ester biosynthetic gene in high oil content lines would be a step towards safe utilization of this plant. To our knowledge, genes involved in biosynthesis of phorbol esters have not been reported in *J. curcas*, with the exception of the gene for geranylgeranyl diphosphate

synthase (GGPPS).<sup>40</sup> In the current study, we searched genes for GGPPS, casbene synthase (CS), terpene hydroxylase (cytochrome P450-dependent monooxygenase), and acyltransferase in the *Jatropha* genome with the tBLASTN program<sup>21</sup> using the corresponding amino acid sequences in diterpene-producing plants as queries (Supplementary Table S8).

One (JcCS1), two (JcCS2 and JcCS3), and six (JcCS4–JcCS9) homologues of a gene for CS in *R. communis* were identified in the BAC clones, JHL23C09, JHL22C18, and JHL17M24, respectively. JcCS2 is a pseudogene because there are several stop codons in the putative open reading frame (ORF). Interestingly, JcCS4–JcCS9 are tandemly aligned and are likely to be active because their ORFs seem to be intact. The phylogenetic tree demonstrates that JcCS4–JcCS9 forms a cluster, suggesting that continuous duplication of the original JcCS gene occurred recently (Supplementary Fig. S2 and Supplementary Table S9). There are 40 genes for terpenoid synthase (AtTPS) in *A. thaliana* that are most closely related to JcCS phylogenetically.<sup>41</sup> They form clusters consisting of two or three tandem repeats at six loci in the genome. The clustered organization of JcCS may be an implication of the evolutionary process of genes related to the synthesis of terpenoid natural products.

**3.4.3. Genes encoding curcin** Curcin is a Type I ribosome-inactivating protein (RIP) common among the members of the Euphobiaceae family. Curcin in *J. curcas* is analogous to ricin, a Type II RIP, in *R. communis*, although the toxicity of curcin is significantly lower than that of ricin.<sup>42</sup> Research on curcin has been extensive,<sup>42</sup> and it has revealed antitumour activity.<sup>43,44</sup> The activity of a curcin protein isoform against viral and fungal diseases has been proven by heterologous expression in tobacco; the expression of this curcin gene was induced by abiotic and biotic stresses in leaves.<sup>45–47</sup> So far, *Jatropha* genes encoding three isoforms of curcin have been reported and deposited in public DNA databases. In our *Jatropha* genome sequence, only three contigs were identified to encode amino acid sequences highly similar to those coding for curcin, confirming that the *Jatropha* genome contains three curcin genes. However, there are four more contigs with presumptive genes predicted to encode curcin-like proteins with *E*-values from  $1e-117$  to  $1e-91$ , as listed in Supplementary Table S10, suggesting that at least two more curcin isoforms are encoded in the *Jatropha* genome because these four additional genes make two pairs with highly similar counterparts. Data from proteomic analysis of developing seeds that is briefly mentioned in Costa *et al.*<sup>6</sup> appear to support this observation as they identified five isoforms of curcin.

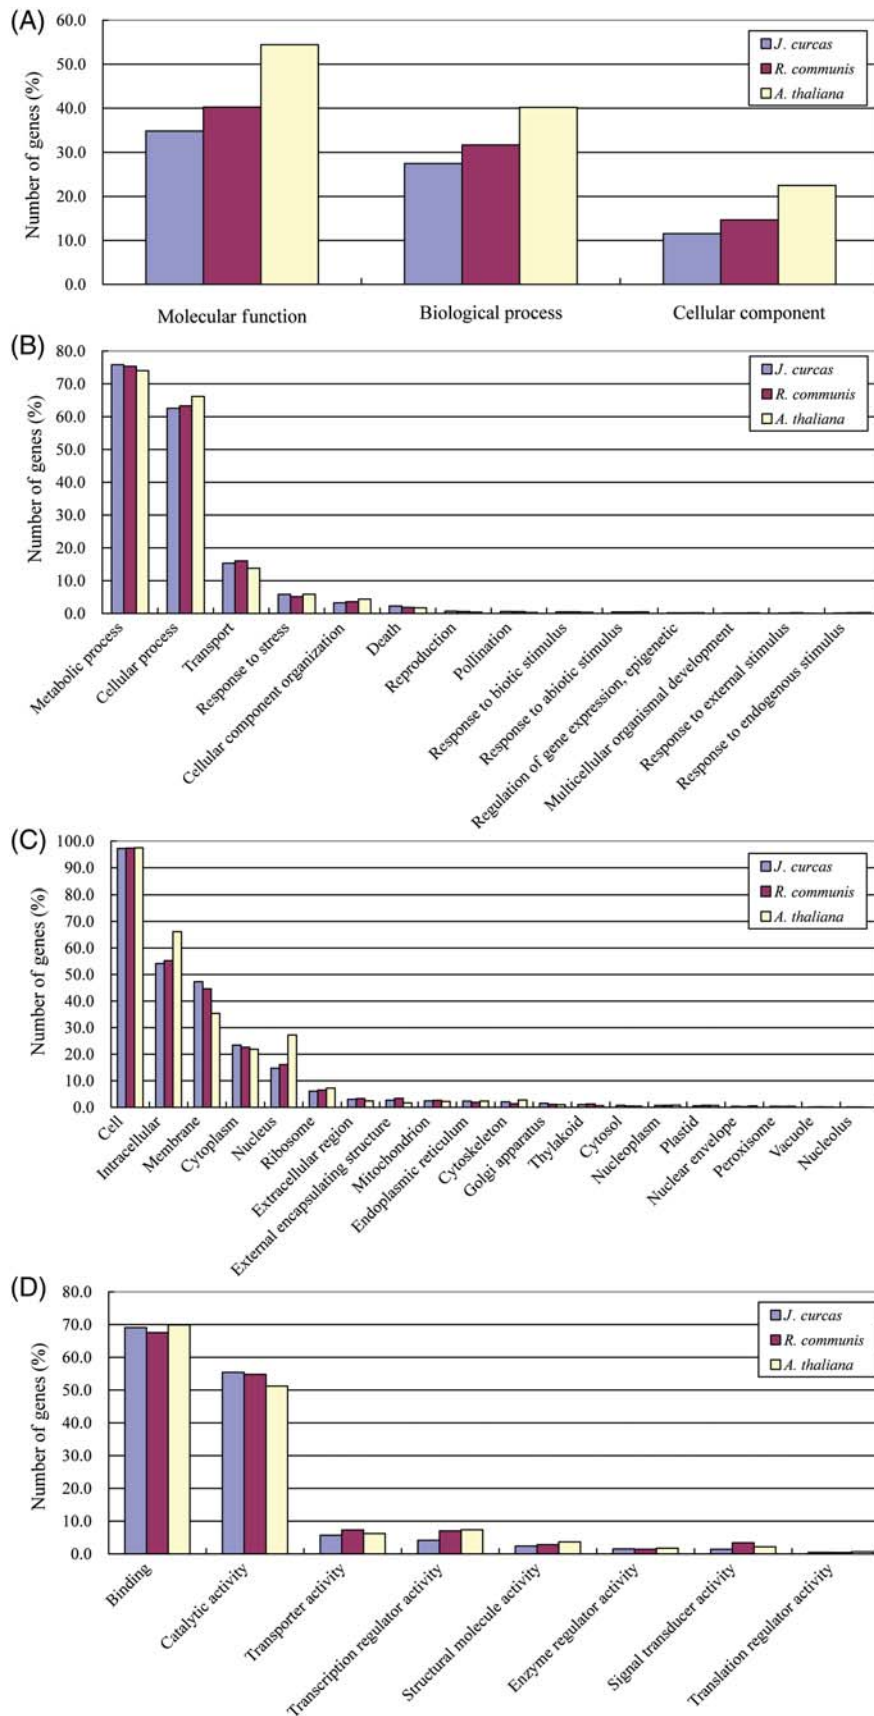

**Figure 2.** GO category classification. The percentages of number of genes classified into each GO slim category in *J. curcas*, *R. communis*, and *A. thaliana* are, respectively, shown in blue, red, and yellow bars. (A) GO terms; (B) biological process; (C) cellular component; and (D) molecular function.



**3.4.4. Disease resistance genes** In response to pathogens, plants have evolved disease resistance (R) genes. Most of them are NBS-LRR (nucleotide-binding site and leucine-rich repeat) proteins, which are classified into two groups on the basis of the presence of Toll and human interleukin receptors (TIR) at their amino termini.<sup>48</sup> We identified 42 TIR NBS-LRR proteins and 50 non-TIR NBS-LRR proteins. We analysed five BAC clones (JHL06P13, JHS03A10, JHL25H03, JHL25P11, and JMS10C05) including R genes to reveal their gene structure (Supplementary Table S4). Two BAC clones (JHS03A10 and JMS10C05) include singletons of JcTIR-NBS-LRR1 and JcNBS-LRR9, whereas three clones (JHL06P13, JHL25H03, and JHL25P11) contain gene clusters as tandem repeats of R genes, JcNBS-LRR1 and JcNBS-LRR2, JcNBS-LRR3–5, or JcNBS-LRR6–8. JcNBS-LRR8 is a pseudogene with a stop codon in the ORF. The phylogenetic tree of R genes including eight R genes in *J. curcas* demonstrated that JcNBS-LRR3–5 or JcNBS-LRR6 and JcNBS-LRR7 are closely related, suggesting that these gene clusters evolved recently by the way of gene duplication (Supplementary Fig. S3 and Supplementary Table S11). Interestingly, JcNBS-LRR1 and JcNBS-LRR2 belong to different clades. This relationship indicates that gene duplication was not recent and that these gene segments were conserved after evolutionary diversification of *J. curcas*.

**3.4.5. MADS-box genes** MADS-box genes, typical homeotic genes coding for transcription factors, form a family and are involved in several aspects of plant development.<sup>49</sup> Many plant species are known to harbour multiple MADS-box genes that belong to a range of functionally divergent subfamilies.<sup>50</sup> We searched for MIKC type II MADS-box genes in the genome of *J. curcas* using amino acid sequences of PI in *A. thaliana* as a query. A total of 28 potential MADS-box genes (JcMADS01–JcMADS28) were identified (Supplementary Table S12). The phylogenetic analysis classified these genes into several subfamilies (Supplementary Fig. S4).

SVP controls flowering time by negatively regulating the expression of a floral integrator, *FLOWERING LOCUS T* in response to ambient temperature changes in *A. thaliana*.<sup>51</sup> Interestingly, there are five paralogs of SVP in *Jatropha*, yet only a single copy and three copies were identified in *A. thaliana* and *Oryza sativa*, respectively.<sup>52,53</sup> Eight paralogs of SVP copies have been found in 57 MIKC type II MADS-box genes of *Populus trichocarpa*,<sup>54</sup> suggesting amplification and functional diversification of the SVP gene in woody plants.

**3.4.6. Flowering-related genes** Flowering in *J. curcas* is closely related to the production of seeds.

*Jatropha curcas* is a monoecious species, which forms unisexual flowers, male and female flowers, separately in an individual plant. The unisexual flowers are produced on the same inflorescence, with the ratio of male flowers to female flowers ranging from 10:1 to 30:1.<sup>55</sup> The male bias ratio within an inflorescence limits seed production because more female flowers mean more fruits. Accordingly, modification of floral identity genes involved in organ identity could change the number or size of male and female organs or flowers.

In the *Jatropha* genomic sequences, we identified eight orthologs of flowering-related genes including five flowering regulators, *CONSTANS*, *FLOWERING LOCUS D*, *FLOWERING LOCUS F*, *LEAFY*, and *SUPPRESSOR OF OVEREXPRESSION OF CONSTANS 1*, designated as *JcCO*, *JcFD*, *JcFT*, *JcLFY*, and *JcSOC1*, respectively, and three floral identity genes, *APETALA2*, *APETALA3*, and *PISTILLATA*, designated as *JcAP2*, *JcAP3-1*, and *JcPI*, respectively (Supplementary Table S13). Phylogenetic analysis indicated that all *Jatropha* flowering-related genes except *JcCO* are closely related to those of woody plants, including *Betula pendula*, *Hevea brasiliensis*, *R. communis*, and *Vitis vinifera* (Supplementary Fig. S5 and Supplementary Table S14). *JcCO* belonged to evolutionary lineages that differ from its homologues in monocot and dicot species. Further phylogenetic analysis indicated that *JcCO* is not related to any flowering-related genes including CO paralogs, a rice CO orthologue Hd1 and light-signalling genes of *AtCOLs*, which are CO-like genes in *A. thaliana* (Supplementary Fig. S6 and Supplementary Table S15). This finding suggests that *JcCO* is not directly involved in flowering regulation, although *JcCO* has all CO-conservative domains as a transcription factor including B-box and CCT motif. There were other CO homologues in the *Jatropha* genome; for example, *JcCOL2* in JcCB0217351.10 and *JcCOL9* in JcCA0317951.10, which suggests that different components participate in the response to light in *J. curcas*.

### 3.5. Comparative analysis

**3.5.1. Genes conserved in the Euphorbiaceae** To identify genes conserved specifically in the family Euphorbiaceae, amino acid sequences translated from the putative *Jatropha* genes predicted in this study were compared with those of genes in the genomes of *A. thaliana*, *O. sativa*, *P. trichocarpa*, *V. vinifera*, *L. japonicus*, and *Glycine max*, as well as protein sequences in the TrEMBL protein database.<sup>33</sup> Sequences from the predicted genes in the *R. communis* genome<sup>34</sup> and the gene index database for cassava (*Manihot esculenta*) were used as references for

Euphorbiaceae protein-encoding genes. BLAST searches with a cut-off ( $E$ -value  $\leq 1e-20$ ) indicated that 1529 genes (4% of the predicted protein-encoding genes) were found only in the Euphorbiaceae. The InterPro annotations of these Euphorbiaceae-specific genes were surveyed to find conserved motifs in these genes, and consequently, 22 InterPro motifs were likely to be conserved in five or more genes (Supplementary Table S16). Of these, the C1-like motif (IPR011424), the pentatricopeptide repeat motif (IPR002885), and the cytochrome P450 motif (IPR001128) were found in 10, 10, and 9 genes, respectively.

Furthermore, 1176 of the genes predicted in the *Jatropha* genome assembly had matching sequences only in the *Jatropha* cDNA database suggesting that these genes are specific to *J. curcas*. The most common InterPro motifs found in these genes were the protein kinase-like domain (IPR011009) detected in six genes (Supplementary Table S17). The entire list of the Euphorbiaceae- and *Jatropha*-specific genes is provided in Supplementary Tables S18 and S19, respectively.

**3.5.2. Microsynteny** To investigate the syntenic relations between the *Jatropha* and the other plant genomes, status of conservation of relative gene positions was surveyed using the scaffolds of *Jatropha* genomic sequences. Among the 1556 scaffolds with five or more predicted genes, conservation of the relative positions of three or more genes was observed in 829 scaffolds (53%) against genes predicted in the *R. communis* genomic sequences<sup>34</sup> (Supplementary Tables S20 and S21). It appears that a significant degree of synteny can be expected within the family Euphorbiaceae. A syntenic relationship was also detected against the genomes of *G. max* and *A. thaliana* to a lesser degree. Microsyntenic relations have been observed in 178 (11%) and 256 (16%) of the 1556 scaffolds of the *Jatropha* genomic sequences, respectively (Supplementary Tables S20 and S21). The microsyntenic relationships between these plant species may provide useful information for predicting gene organization in the ancestral genome of dicots.

**3.5.3. Genetic diversity among *Jatropha* lines** Five SSR motives were found in the 100 genome-derived microsatellite markers tested. Most of the SSRs were poly (AT)<sub>n</sub> (83 SSRs), followed by poly (AAT)<sub>n</sub> (8 SSRs), poly (AG)<sub>n</sub> (5 SSRs), poly (AAG)<sub>n</sub> (3 SSRs), and poly (AC)<sub>n</sub> (1 SSR). A total of 88 markers generated specific amplicons, whereas the other eight and four markers showed no amplification and non-specific amplification, respectively (Supplementary Fig. S7). The small number of markers detecting non-specific amplification suggested less redundancy

of SSR regions in the *Jatropha* genome. The number of alleles per locus ranged from one to four with a mean value of 1.31. Markers showed no polymorphisms; those detecting a single allele were most frequent. PIC values ranged from 0 to 0.45 with a mean value of 0.06 (Supplementary Fig. S8). The large number of markers detecting no polymorphisms and the low mean value of the PIC indicated that genetic diversity in *Jatropha* lines is generally narrow. An UPGMA genetic tree of the 12 lines of *J. curcas* illustrated that the three lines derived from meso-America regions (Guatemala1, Guatemala2, and Mexico2b) are genetically distinct from the other lines derived from Asia and Africa, whereas no significant difference was observed between the Asian and African lines (Supplementary Fig. S9).

#### 4. Databases

Information about the genomic sequences (contigs and singlets) and BAC clone sequences is available through international databases (DDBJ/GenBank/EMBL) under accession numbers BABX01000001–BABX01150417 (150 417 entries) and AP011961–AP011977 (17 entries), respectively. Single reads of cDNA by GS FLX sequencer derived from leaf and callus tissue are available through DDBJ Sequence Read Archive under accession numbers DRA000303 and DRA000304, respectively. Paired-end reads of genome by GAllx sequencer with 36 bp long, and 50 and 31 bp long are available through DDBJ Sequence Read Archive under accession numbers DRA000305 and DRA000306, respectively. An online database that provides the nucleotide sequences and the predicted genes is available at <http://www.kazusa.or.jp/jatropha/>.

**Acknowledgements:** Special thanks are extended to Profs. Kazuyoshi Itoh and Yasuo Kanematsu of the Graduate School of Engineering, Osaka University, for their guidance and support during the genome project.

**Supplementary Data:** Supplementary data are available at [www.dnaresearch.oxfordjournals.org](http://www.dnaresearch.oxfordjournals.org).

#### Funding

We thank the Sumitomo Electric Industries, Ltd. for their philanthropic donation of funds to aid the *Jatropha* genome project celebrating the 110th anniversary of their foundation. This work was also supported by the Kazusa DNA Research Institute Foundation.

## References

1. Openshaw, K. 2000, A review of *J. curcas*: an oil plant of unfulfilled promise, *Biomass Bioenergy*, **19**, 1–15.
2. Wouter, H.M., Wouter, M.J.A. and Bart, M. 2009, Use of inadequate data and methodological errors lead to a dramatic overestimation of the water footprint of *Jatropha curcas*, *Nature Precedings*, hdl:10101/npre.2009.3410.1 <http://precedings.nature.com/documents/3410/version/1>.
3. Fairless, D. 2007, Biofuel: the little shrub that could—maybe, *Nature*, **449**, 652–655.
4. Biello, D. 2009, Green fuels for jets, *Sci. Am.*, **19**, 68–69.
5. Carvalho, C.R., Clarindoa, W.R., Praça, M.M., Araújo, F.S. and Carels, N. 2008, Genome size, base composition and karyotype of *Jatropha curcas* L., an important biofuel plant, *Plant Sci.*, **174**, 613–617.
6. Costa, G.G., Cardoso, K.C., Del Bem, L.E., et al. 2010, Transcriptome analysis of the oil-rich seed of the bioenergy crop *Jatropha curcas* L., *BMC Genomics*, **11**, 462.
7. Sato, S., Nakamura, Y., Kaneko, T., et al. 2008, Genome structure of the legume, *Lotus japonicus*, *DNA Res.*, **15**, 227–239.
8. White, J.R., Roberts, M., Yorke, J.A. and Pop, M. 2008, Figaro: a novel statistical method for vector sequence removal, *Bioinformatics*, **24**, 462–467.
9. Huang, X., Yang, S.P., Chinwalla, A.T., et al. 2006, Application of a superword array in genome assembly, *Nucleic Acids Res.*, **34**, 201–205.
10. Quinlan, A.R., Stewart, D.A., Strömberg, M.P. and Marth, G.T. 2008, Pyrobayes: an improved base caller for SNP discovery in pyrosequences, *Nat. Methods*, **5**, 179–181.
11. Gomez-Alvarez, V., Teal, T.K. and Schmidt, T.M. 2009, Systematic artifacts in metagenomes from complex microbial communities, *ISME J.*, **3**, 1314–1317.
12. Chevreur, B., Wetter, T. and Suhai, S. 1999, Genome sequence assembly using trace signals and additional sequence information, In: *Computer Science and Biology: Proceedings of the German Conference on Bioinformatics (GCB)*, 99, pp. 45–56.
13. Unseld, M., Marienfeld, J.R., Brandt, P. and Brennicke, A. 1997, The mitochondrial genome of *Arabidopsis thaliana* contains 57 genes in 366,924 nucleotides, *Nat. Genet.*, **15**, 57–61.
14. Zhang, Z., Schwartz, S., Wagner, L. and Miller, W.A. 2000, Greedy algorithm for aligning DNA sequences, *J. Comput. Biol.*, **7**, 203–214.
15. Zerbino, D.R. and Birney, E. 2008, Velvet: algorithms for *de novo* short read assembly using de Bruijn graphs, *Genome Res.*, **18**, 821–829.
16. Kent, W.J. 2002, BLAT—the BLAST-like alignment tool, *Genome Res.*, **12**, 656–664.
17. Lukashin, A. and Borodovsky, M. 1998, GeneMark.hmm: new solutions for gene finding, *Nucleic Acids Res.*, **26**, 1107–1115.
18. Burge, C. and Karlin, S. 1997, Prediction of complete gene structures in human genomic DNA, *J. Mol. Biol.*, **268**, 78–94.
19. Hebsgaard, S.M., Korning, P.G., Tolstrup, N., Engelbrecht, J., Rouzé, P. and Brunak, S. 1996, Splice site prediction in *Arabidopsis thaliana* pre-mRNA by combining local and global sequence information, *Nucleic Acids Res.*, **24**, 3439–3452.
20. Brendel, V. and Kleffe, J. 1998, Prediction of locally optimal splice sites in plant pre-mRNA with applications to gene identification in *Arabidopsis thaliana* genomic DNA, *Nucleic Acids Res.*, **26**, 4748–4757.
21. Altschul, S.F., Madden, T.L. and Schäffer, A.A. 1997, Gapped BLAST and PSI-BLAST: a new generation of protein database search programs, *Nucleic Acids Res.*, **25**, 3389–3402.
22. Huang, X. and Zhang, J. 1996, Methods for comparing a DNA sequence with a protein sequence, *Comput. Appl. Biosci.*, **12**, 497–506.
23. Ashburner, M., Ball, C.A., Blake, J.A., et al., 2000, Gene ontology: tool for the unification of biology. The Gene Ontology Consortium, *Nat. Genet.*, **25**, 25–29.
24. Hunter, S., Apweiler, R., Attwood, T.K., et al., 2009, InterPro: the integrative protein signature database, *Nucleic Acids Res.*, **37**, D211–215.
25. Ogata, H., Goto, S., Sato, K., Fujibuchi, W., Bono, H. and Kanehisa, M. 1999, KEGG: Kyoto encyclopedia of genes and genomes, *Nucleic Acids Res.*, **27**, 29–34.
26. Thompson, J.D., Higgins, D.G. and Gibson, T.J. 1994, CLUSTAL W: improving the sensitivity of progressive multiple sequence alignment through sequence weighting, position-specific gap penalties and weight matrix choice, *Nucleic Acids Res.*, **122**, 4673–4680.
27. Saitou, N. and Nei, M. 1987, The neighbor-joining method: a new method for reconstructing phylogenetic trees, *Mol. Biol. Evol.*, **4**, 406–425.
28. Tamura, K., Dudley, J., Nei, M. and Kumar, S. 2007, MEGA4: Molecular Evolutionary Genetics Analysis (MEGA) software version 4.0, *Mol. Biol. Evol.*, **24**, 1596–1599.
29. Temnykh, S., DeClerck, G., Lukashova, A., Lipovich, L., Cartinhour, S. and McCouch, S. 2001, Computational and experimental analysis of microsatellites in rice (*Oryza sativa* L.): frequency, length variation, transposon associations, and genetic marker potential, *Genome Res.*, **11**, 1441–1452.
30. Steve, R. and Helen, J.S. 2000, Primer3 on the WWW for general users and for biologist programmers, *Methods Mol. Biol.*, **132**, 365–386.
31. Bao, Z. and Eddy, S.R. 2002, Automated *de novo* identification of repeat sequence families in sequenced genomes, *Genome Res.*, **12**, 1269–1276.
32. Wang, B.B. and Brendel, V. 2004, The ASRG database: identification and survey of *Arabidopsis thaliana* genes involved in pre-mRNA splicing, *Genome Biol.*, **5**, R102.
33. Bairoch, A. and Apweiler, R. 1996, The SWISS-PROT protein sequence data bank and its new supplement TREMBL, *Nucleic Acids Res.*, **24**, 21–25.
34. Chan, A.P., Crabtree, J., Zhao, Q., et al., 2010, Draft genome sequence of the oilseed species *Ricinus communis*, *Nat. Biotechnol.*, **28**, 951–956.
35. Carbon, S., Ireland, A., Mungall, C.J., Shu, S., Marshall, B. and Lewis, S. 2009, AmiGO: online access to ontology and annotation data, *Bioinformatics*, **15**, 288–289.
36. Tong, L., Shu-Ming, P., Wu-Yuan, D., et al. 2006, Characterization of a new stearyl-acyl carrier protein

- desaturase gene from *Jatropha curcas*, *Biotechnol. Lett.*, **28**, 657–662.
37. Ye, J., Qu, J., Bui, H.T.N. and Chua, N.H. 2009, Rapid analysis of *Jatropha curcas* gene functions by virus-induced gene silencing, *Plant Biotechnol. J.*, **7**, 964–976.
38. Saha, S., Enugutti, B., Rajakumari, S. and Rajasekharan, R. 2006, Cytosolic triacylglycerol biosynthetic pathway in oilseeds. Molecular cloning and expression of peanut cytosolic diacylglycerol acyltransferase, *Plant Physiol.*, **141**, 1533–1543.
39. Haas, W., Sterk, H. and Mittelbach, M. 2002, Novel 12-deoxy-16-hydroxy phorbol diesters isolated from the seed oil of *J. curcas*, *J. Nat. Prod.*, **65**, 1434–1440.
40. Lin, J., Jin, Y.J., Zhou, X. and Wang, J.Y. 2010, Molecular cloning and functional analysis of the gene encoding geranylgeranyl diphosphate synthase from *J. curcas*, *Afr. J. Biotechnol.*, **9**, 3342–3351.
41. Aubourg, S., Lecharny, A. and Bohlmann, J. 2002, Genomic analysis of the terpenoid synthase (AtTPS) gene family of *Arabidopsis thaliana*, *Mol. Genet. Genomics*, **267**, 730–745.
42. Stirpe, F., Pession-Brizzi, A., Lorenzoni, E., Strocchi, P., Montanaro, L. and Sperti, S. 1976, Studies on the proteins from the seeds of *Croton tiglium* and of *Jatropha curcas*. Toxic properties and inhibition of protein synthesis *in vitro*, *Biochem. J.*, **156**, 1–6.
43. Luo, M.J., Yang, X.Y., Liu, W.X., et al. 2006, Expression, purification and anti-tumor activity of curcin, *Acta Biochim. Biophys. Sin.*, **38**, 663–668.
44. Lin, J., Yan, F., Tang, L. and Chen, F. 2003, Antitumor effects of curcin from seeds of *Jatropha curcas*, *Acta Pharmacol. Sin.*, **24**, 241–246.
45. Qin, X., Zheng, X., Shao, C., et al. 2009, Stress-induced curcin-L promoter in leaves of *Jatropha curcas* L. and characterization in transgenic tobacco, *Planta*, **230**, 387–395.
46. Qin, W., Ming-Xing, H., Ying, X., Xin-Shen, Z. and Fang, C. 2005, Expression of a ribosome inactivating protein (curcin 2) in *Jatropha curcas* is induced by stress, *J. Biosci.*, **30**, 351–357.
47. Huang, M.-X., Hou, P., Wei, Q., Xu, Y. and Chen, F. 2008, A ribosome-inactivating protein (curcin 2) induced from *Jatropha curcas* can reduce viral and fungal infection in transgenic tobacco, *Plant Growth Regul.*, **54**, 115–123.
48. Eitas, T.K. and Dangl, J.L. 2010, NB-LRR proteins: pairs, pieces, perception, partners, and pathways, *Curr. Opin. Plant Biol.*, **13**, 472–477.
49. Alvarez-Buylla, E.R., Pelaz, S., Liljegren, S.J., et al. 2000, An ancestral MADS-box duplication occurred before the divergence of plants and animals, *Proc. Natl Acad. Sci. USA*, **97**, 5328–5333.
50. Rijpkema, A.S., Gerats, T. and Vandenbussche, M. 2007, Evolutionary complexity of MADS complexes, *Curr. Opin. Plant Biol.*, **10**, 32–38.
51. Lee, J.H., Yoo, S.J., Park, S.H., Hwang, I., Lee, J.S. and Ahn, J.H. 2007, Role of SVP in the control of flowering time by ambient temperature in *Arabidopsis*, *Genes Dev.*, **21**, 397–402.
52. Hartmann, U., Höhmann, S., Nettesheim, K., Wisman, E., Saedler, H. and Huijser, P. 2000, Molecular cloning of SVP: a negative regulator of the floral transition in *Arabidopsis*, *Plant J.*, **21**, 351–360.
53. Lee, S., Choi, S.C. and An, G. 2008, Rice SVP-group MADS-box proteins, OsMADS22 and OsMADS55, are negative regulators of brassinosteroid responses, *Plant J.*, **54**, 93–105.
54. Leseberg, C.H., Li, A., Kang, H., Duvall, M. and Mao, L. 2006, Genome-wide analysis of the MADS-box gene family in *Populus trichocarpa*, *Gene*, **378**, 84–94.
55. Dehgan, B. and Webster, G. 1992, Morphology and infrageneric relationships of the genus *J. curcas*. University of California Press, Berkeley, CA, USA.
